# Supplementary material for: Low-smoke chulha in Indian slums: study protocol for a randomised controlled trial
Source: PubMed Central journal article supplement (PMC5434517; doi:10.1186/s12889-017-4369-6), 2017-05-16
Supplement: 12889_2017_4369_MOESM2_ESM.pdf [file 12889_2017_4369_MOESM2_ESM.pdf]

**Interview guide: Changes in behavior and attitude of users  
For primary cook**

Remarks:

- 1) **All answers will be recorded**
- 2) **The interviewer can ask probing questions if necessary**
- 3) The participant can always choose to give no response

The participant has signed the informed consent form and opportunity has been given to ask questions and clear up any doubts  
(confirm in order to continue)

**General information**

Household ID *(to be filled by interviewer):*

Person ID *(to be filled by interviewer):*

Name:

Name interviewer *(to be filled by interviewer):*

Date of interview *(to be filled by interviewer):*

- What are the things you don't like about the stove?
- What are the things you like about the stove?
- Did you make any changes to the stove? If yes, why?
- How can the stove be improved?
- In your opinion, why do you think it is difficult for other people to adopt the new stove?
- In your opinion, why do you think other people are using the new stove?
